# Supplementary material
Source: Springer Nature journal article supplement (https://www.springermedizin.de/resource/supplementary/13023_2013_698_MOESM1_ESM.pdf/9642980)
Supplement: MOESM1 [file 9642980]

**Supplemental Table 1 – Mutations found at ABCD1 gene in the present X-ALD heterozygote women, and the distribution of ages at examination and at onset of symptoms.**

| Mutations (exon)                        | Number of women<br><br>Total (asymptomatic women, when present) | Age at examination<br><br>median $\pm$ dp (variation), when possible | Age at onset of symptoms |
|-----------------------------------------|-----------------------------------------------------------------|----------------------------------------------------------------------|--------------------------|
|                                         | 33<br>(4)                                                       | 41.2 $\pm$ 11.9                                                      | 39.4 $\pm$ 10<br>(21-59) |
| p.Ala232fsX64,<br>family 21<br>(Exon 2) | 1                                                               | 24                                                                   | 22                       |
| p.Gly266Arg,<br>family 12<br>(Exon 2)   | 2                                                               | 25 and 47                                                            | 21 and 42                |
| p.Tyr296Cys,<br>family 24<br>(Exon 2)   | 2                                                               | 43 and 44                                                            | 38 and 42                |
| p.Trp326X,<br>family 6<br>(Exon 2)      | 2                                                               | 25 and 50                                                            | 24 and 43                |
| p.Ser358X,<br>family 37<br>(Exon 2)     | 1                                                               | 36                                                                   | 33                       |
| p.Arg401Trp,<br>family 32<br>(Exon 3)   | 1                                                               | 48                                                                   | 45                       |
| p.Arg401Gly,<br>family 52<br>(Exon 3)   | 1                                                               | 35                                                                   | 34                       |
| p.Arg401Trp,<br>family 58<br>(Exon 3)   | 1                                                               | 40                                                                   | 39                       |
| p.Gly512Ser,<br>family 1<br>(Exon 6)    | 2<br>(1)                                                        | 52                                                                   | 46                       |
| p.Arg518Gln,<br>family 10<br>(Exon 6)   | 7                                                               | 44.6 $\pm$ 8<br>(32-55)                                              | 36.7 $\pm$ 7<br>(26-44)  |
| p.Glu577X,<br>family 8<br>(Exon 7)      | 2<br>(1)                                                        | 55                                                                   | 50                       |
| p.Trp601X,<br>family 3<br>(Exon 8)      | 1<br>(1)                                                        |                                                                      | ?                        |
| p.Ser606Leu,<br>family 2<br>(Exon 8)    | 2<br>(1)                                                        | 49                                                                   | 43                       |
| p.Arg617His,<br>family 4<br>(Exon 8)    | 5                                                               | 48 $\pm$ 12<br>(27-56)                                               | 45 $\pm$ 11<br>(26-55)   |
| p.Leu628Glu,                            | 1                                                               | 45                                                                   | 41                       |

|                                      |   |           |           |
|--------------------------------------|---|-----------|-----------|
| family 27<br>(Exon 9)                |   |           |           |
| p.Trp679X,<br>family 23<br>(Exon 10) | 2 | 41 and 61 | 39 and 59 |
